# Supplementary material
Source: PubMed Central journal article supplement (PMC7960086)
Supplement: 16-00863.pdf [file 16-00863.pdf]

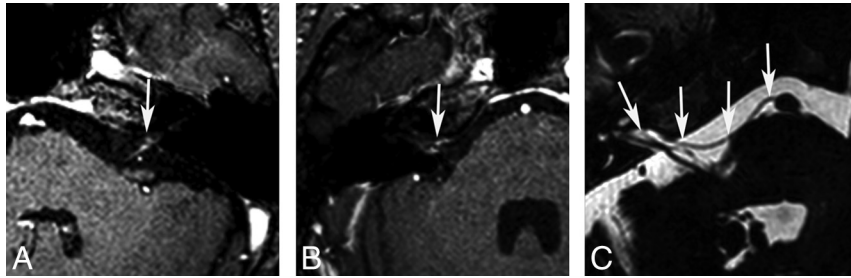

**ON-LINE FIG 1.** Types of AICA loops. *A*, On 3D post-contrast-enhanced T1WI, enhancing type I AICA loops lie within the CPA (*arrow*) but do not enter the IAC. *B*, On 3D post-contrast-enhanced T1WI, enhancing type II AICA loops enter the IAC (*arrow*) but do not extend into >50% of the length of the IAC. *C*, Type III AICA loops extend into >50% of the IAC (*arrows*). Note that the course of AICA is well-visualized from its origin at the basilar artery to the IAC on a multiplanar reconstructed image of T2-VISTA.

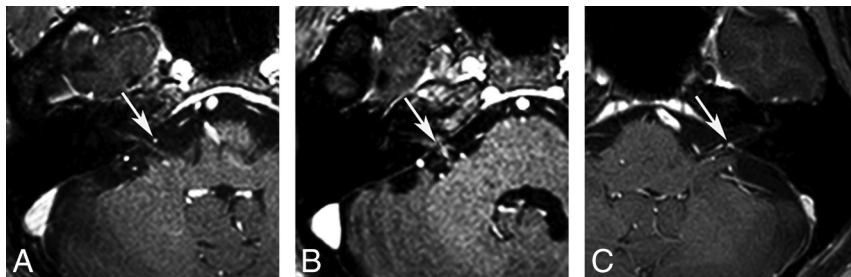

**ON-LINE FIG 2.** Neurovascular contact types between the AICA and the cochleovestibular nerve. The arterial enhancement of AICA (*arrows*) is verified on 3D post-contrast-enhanced T1WI. *A*, A type I neurovascular contact shows no neurovascular contact. *B*, A type II neurovascular contact shows contact between the AICA and the cochleovestibular nerve without angulation/indentation of the nerve. *C*, A type III neurovascular contact shows angulation/indentation of the cochleovestibular nerve by the AICA loop.
